# Supplementary material for: Warm proglacial lake temperatures and thermal undercutting enhance rapid retreat of an Arctic glacier
Source: Copernicus journal article supplement (doi:10.5194/tc-19-4471-2025), 2025-10-10
Supplement: Supplementary file 1 [file tc-19-4471-2025-supplement.pdf]

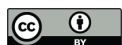

*Supplement of*

**Warm proglacial lake temperatures and thermal undercutting enhance rapid retreat of an Arctic glacier**

**Adrian Dye et al.**

*Correspondence to:* Adrian Dye (ardye@hotmail.co.uk, a.dye@tees.ac.uk)

The copyright of individual parts of the Supplement might differ from the article licence.

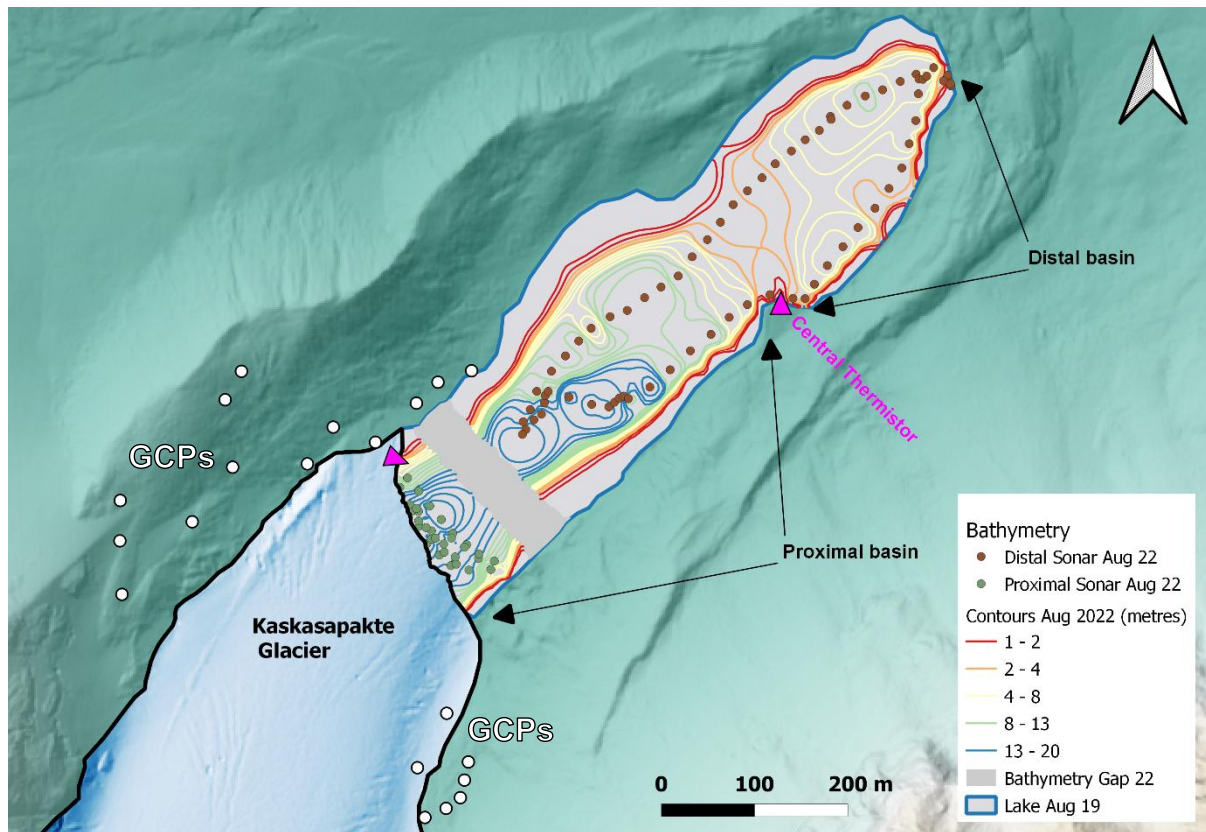

**Figure S1 - Digital Elevation model with outline of Kaskasapakte Glacier from 3<sup>rd</sup> August 2019 and bathymetry from sonar surveys (sampled at 30 seconds) in August 2022. Ground control points (GCPs) (19/8/2019) used for SfM model are shown as white dots. Thermistor positions shown as pink triangles.**

**Table S1– Calving classification from July 2017 timelapse imagery (observations every minute from 17:43 on 24<sup>th</sup> July until 14:21 on 28<sup>th</sup> July). 1 = ice fall; 2 = sheet collapse; 3 = stack topple; 4 = waterline; 5 = subaqueous; 6 = roof/arch collapse; and 7 = unknown.**

| Date       | Time  | Calving Class | Notes                       |
|------------|-------|---------------|-----------------------------|
| 24/07/2017 | 20:50 | 7             | Berg from englacial conduit |
| 24/07/2017 | 20:53 | 7             | Berg from englacial conduit |
| 25/07/2017 | 05:45 | 4             |                             |
| 25/07/2017 | 16:21 | 7             | Berg from englacial conduit |
| 25/07/2017 | 16:31 | 7             | Berg from englacial conduit |
| 25/07/2017 | 19:27 | 7             | Berg from englacial conduit |
| 26/07/2017 | 00:03 | 4             |                             |
| 26/07/2017 | 02:03 | 2             |                             |
| 26/07/2017 | 04:21 | 2             |                             |
| 26/07/2017 | 09:42 | 2             |                             |
| 26/07/2017 | 09:42 | 6             |                             |
| 26/07/2017 | 09:42 | 4             |                             |
| 26/07/2017 | 10:57 | 6             |                             |
| 26/07/2017 | 18:34 | 7             | Berg from englacial conduit |
| 26/07/2017 | 19:53 | 7             | Berg from englacial conduit |
| 26/07/2017 | 20:44 | 7             | Berg from englacial conduit |

|            |       |   |                             |
|------------|-------|---|-----------------------------|
| 26/07/2017 | 21:36 | 7 | Berg from englacial conduit |
| 26/07/2017 | 23:29 | 7 | Berg from englacial conduit |
| 27/07/2017 | 16:50 | 7 | Berg from englacial conduit |
| 27/07/2017 | 20:52 | 7 | Berg from englacial conduit |
| 27/07/2017 | 23:59 | 7 | Berg from englacial conduit |
| 28/07/2017 | 11:44 | 7 | Berg from englacial conduit |

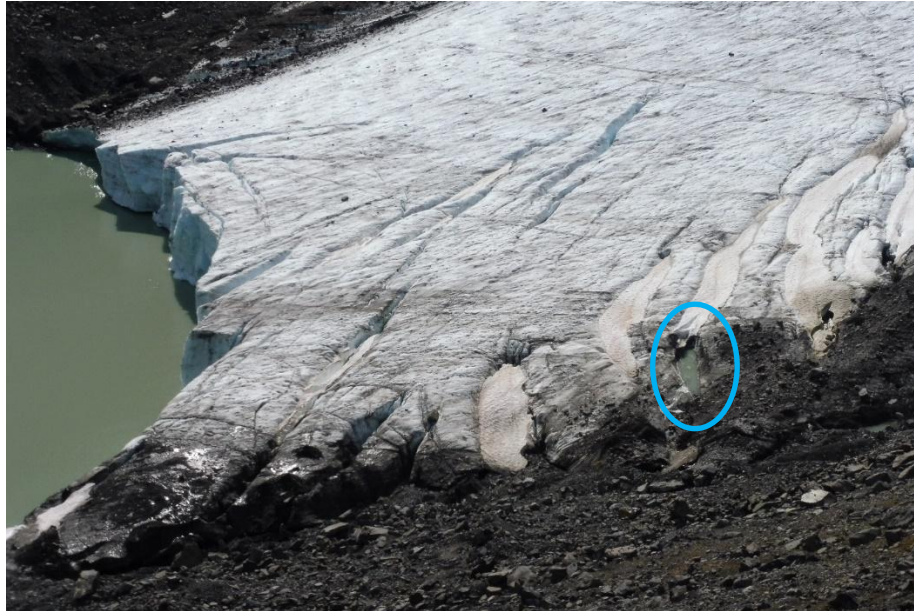

**Figure S2 – Image of Kaskasapakte glacier terminus 4<sup>th</sup> August 2019, taken from western moraine crest on Panasonic Lumix (DMC-TZ57) (focal length 12 mm; exposure time 1/800 sec). Note the water filled crevasse in the lower right of the image (blue circle).**

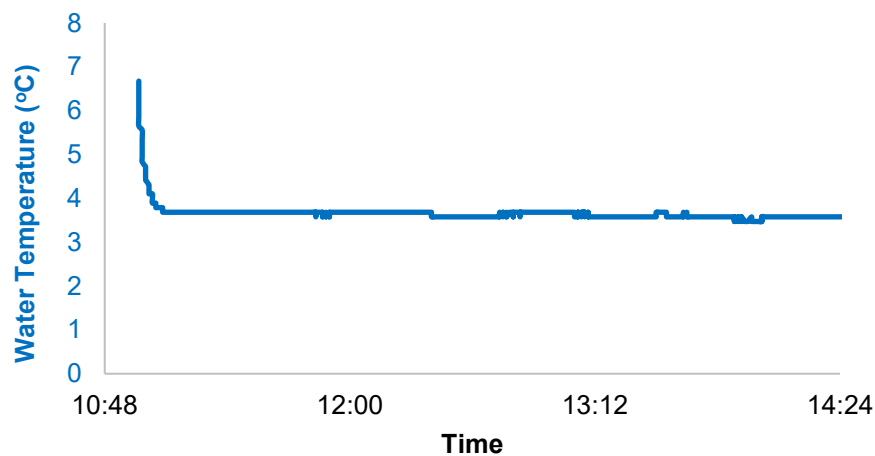

**Figure S3 – Water Temperature ( $\pm 0.5$  °C) at 20m depth from temporary cast in front of glacier terminus on 8<sup>th</sup> August 2019. Note that immersion time was 10:51, with several minutes of sensor settling time afterwards.**

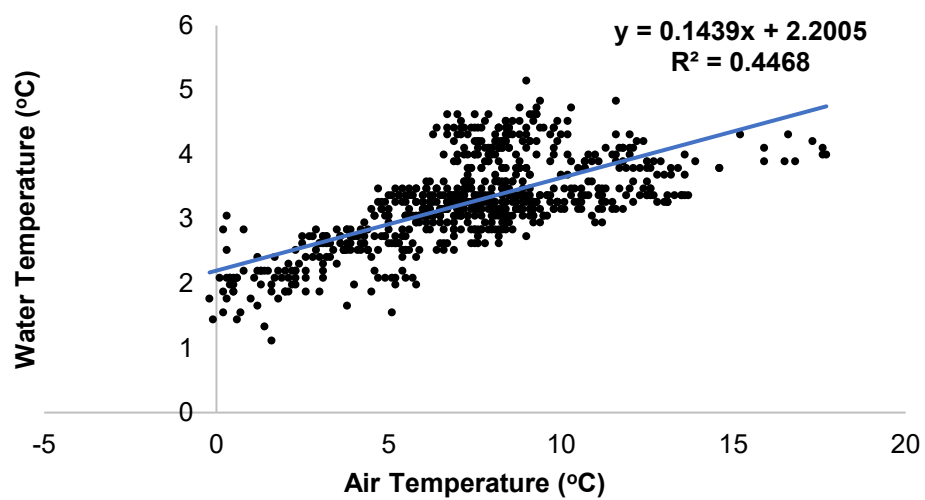

**Figure S4 – Water temperature from 5m depth at central point in Kaskasapakte lake against 2m air temperature at Tarfala Research Station (SMHI).**

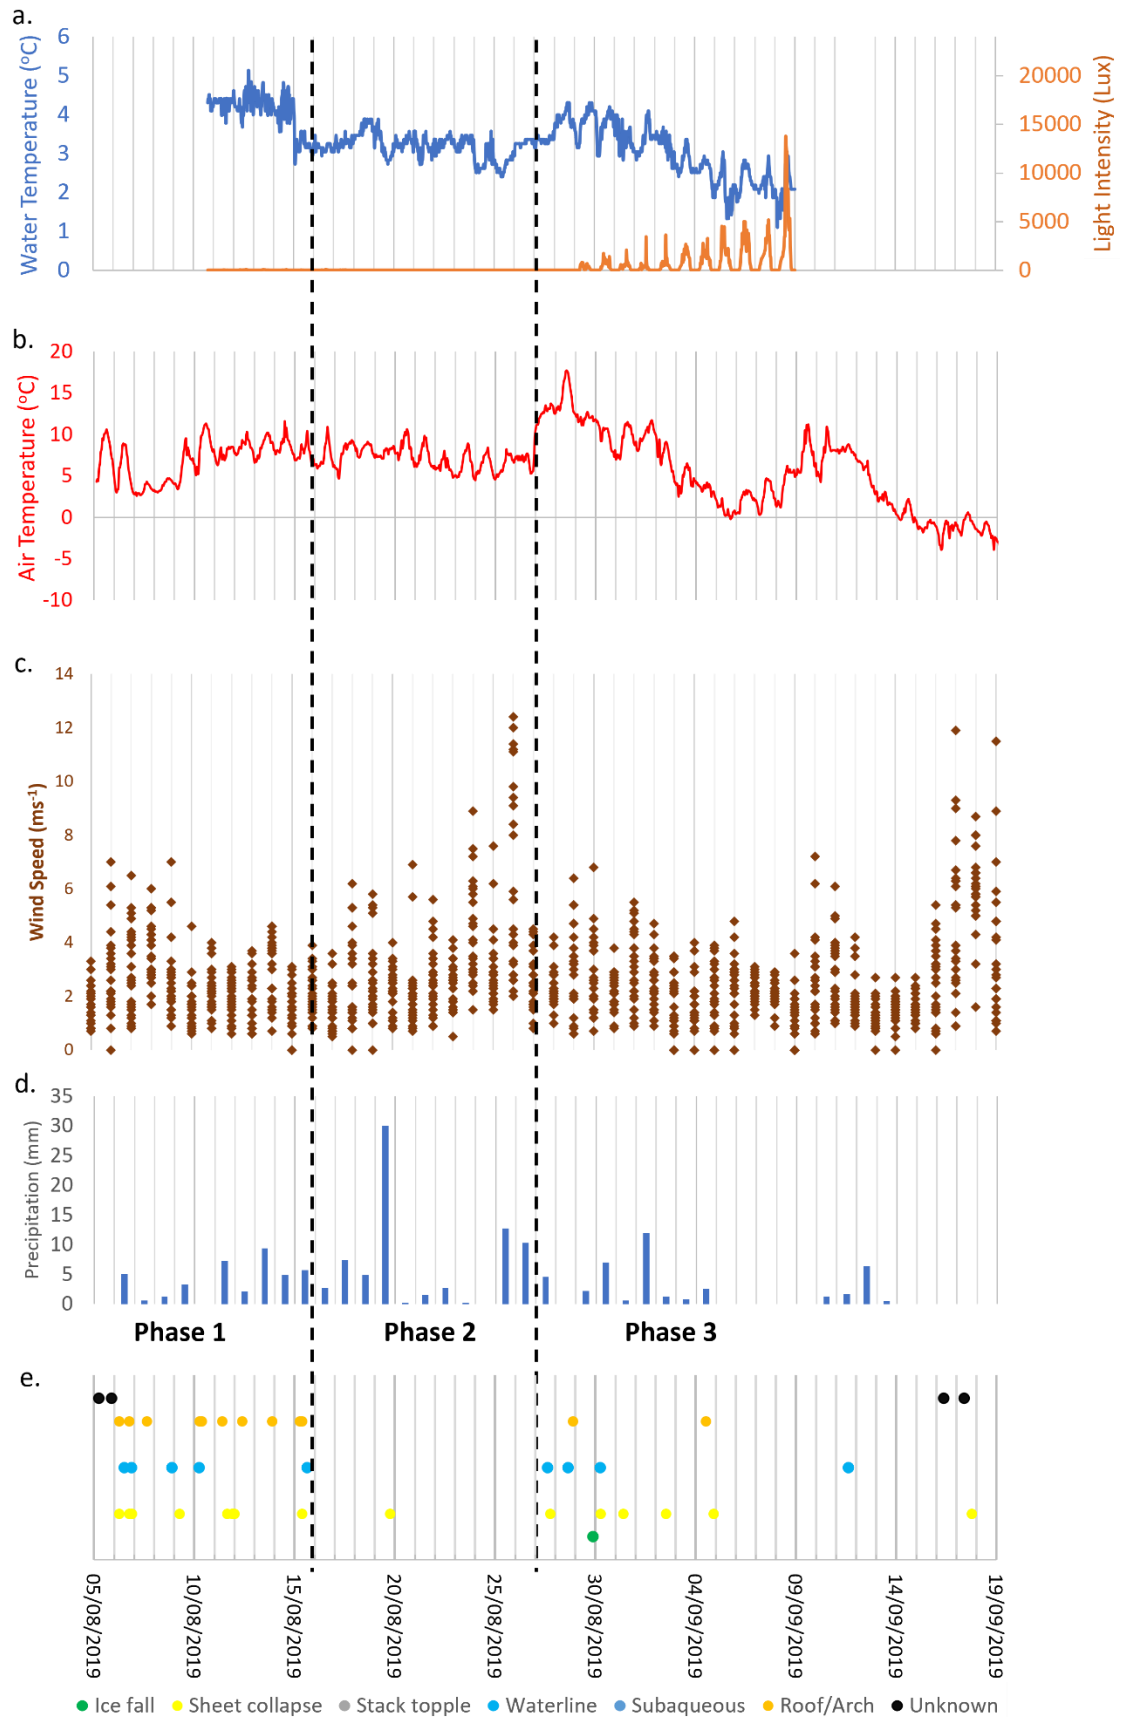

**Figure S5 – a. Water temperature (from 5m deep at central part of lake) and b. hourly air temperature (from Tarfala), c. wind speed d. daily precipitation (Tarfala; SMHI) and e. calving classification from timelapse from 5th August to 19<sup>th</sup> September 2019.**



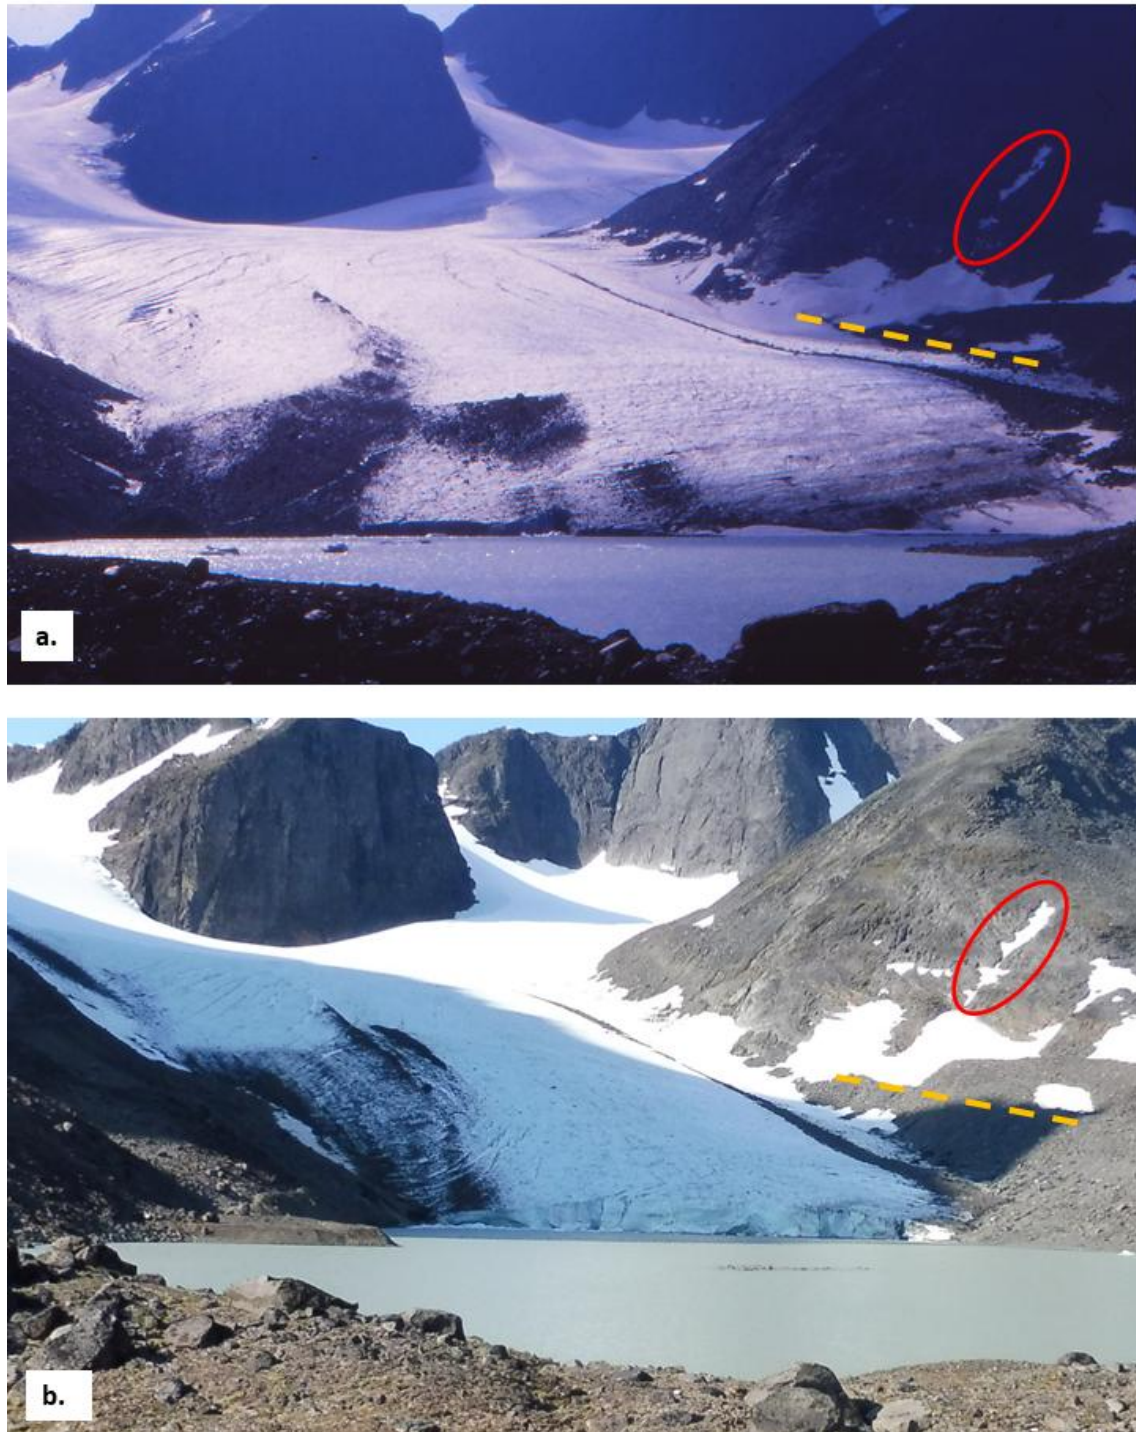

Figure S6 Image of Kaskasapakte and proglacial lake taken in a. 1988 (photo; V. Pohjola) and b. 2019 (photo; A. Dye). Yellow line = lateral margin. Red circle = snow patch for reference marker. Note the emergence of supraglacial debris bands near the ice front.

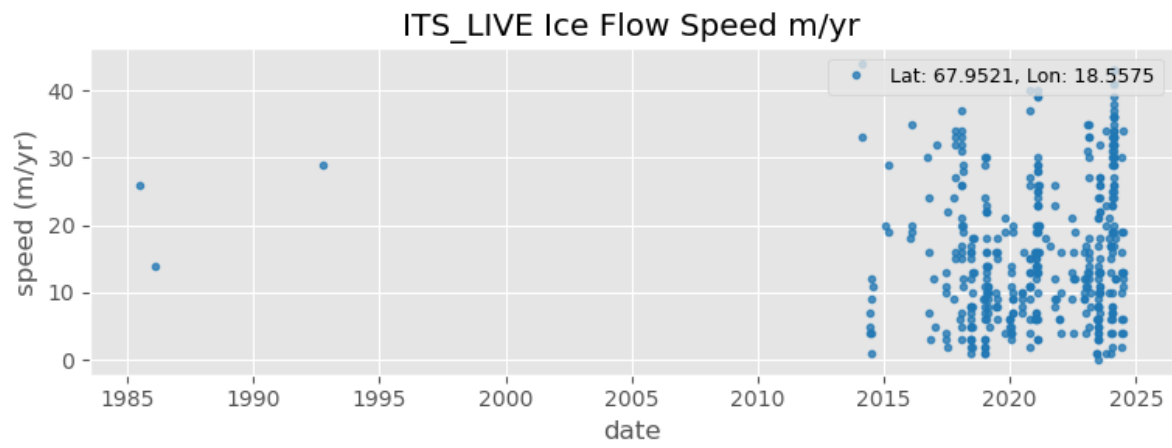

**Figure S7. Summer (1<sup>st</sup> July to 15<sup>th</sup> September) point ( 67.9521 N, 18.5575 E) surface velocities derived from NASA ITS\_LIVE feature tracking for central part of KG lower ablation area.**
